# Supplementary material
Source: PubMed Central journal article supplement (PMC4879269)
Supplement: JCM.00548-16_zjm999095000so1.pdf [file JCM.00548-16_zjm999095000so1.pdf]

Supplemental Table 1: Summary of Method Comparison Results to Detect Carbapenem-Resistant Organisms from Rectal Swabs.

|                                                                                                              | CDC <sup>a</sup>                                                                                                                                                                                                                                                                                    | CDC + vanco <sup>b</sup>                                                                                                                                                                                                                                                                                                                                                                                                                                      | Direct MAC <sup>c</sup>                                                                                                                                                                                                                                                                                                                                                                                                                               | ChromID CARBA                                                                                                                                                                                                                                                                                                                                                                                     | Check-Direct CPE | Total                                                                                                                                                                                                                                                                                                                                                                                                                                                                                                                                                                                       |
|--------------------------------------------------------------------------------------------------------------|-----------------------------------------------------------------------------------------------------------------------------------------------------------------------------------------------------------------------------------------------------------------------------------------------------|---------------------------------------------------------------------------------------------------------------------------------------------------------------------------------------------------------------------------------------------------------------------------------------------------------------------------------------------------------------------------------------------------------------------------------------------------------------|-------------------------------------------------------------------------------------------------------------------------------------------------------------------------------------------------------------------------------------------------------------------------------------------------------------------------------------------------------------------------------------------------------------------------------------------------------|---------------------------------------------------------------------------------------------------------------------------------------------------------------------------------------------------------------------------------------------------------------------------------------------------------------------------------------------------------------------------------------------------|------------------|---------------------------------------------------------------------------------------------------------------------------------------------------------------------------------------------------------------------------------------------------------------------------------------------------------------------------------------------------------------------------------------------------------------------------------------------------------------------------------------------------------------------------------------------------------------------------------------------|
| <b>Broth Enrichment Method Results:</b>                                                                      |                                                                                                                                                                                                                                                                                                     |                                                                                                                                                                                                                                                                                                                                                                                                                                                               |                                                                                                                                                                                                                                                                                                                                                                                                                                                       |                                                                                                                                                                                                                                                                                                                                                                                                   |                  |                                                                                                                                                                                                                                                                                                                                                                                                                                                                                                                                                                                             |
| Number of Cultures with Turbid Broths                                                                        | 157 (73.7%)                                                                                                                                                                                                                                                                                         | 72 (33.8%)                                                                                                                                                                                                                                                                                                                                                                                                                                                    | N/A                                                                                                                                                                                                                                                                                                                                                                                                                                                   | N/A                                                                                                                                                                                                                                                                                                                                                                                               | N/A              | N/A                                                                                                                                                                                                                                                                                                                                                                                                                                                                                                                                                                                         |
| Number of Cultures with Growth on Subculture from a Turbid Broth to a MacConkey plate with an Ertapenem Disk | 71 (33.3%)                                                                                                                                                                                                                                                                                          | 35 (16.4%)                                                                                                                                                                                                                                                                                                                                                                                                                                                    | N/A                                                                                                                                                                                                                                                                                                                                                                                                                                                   | N/A                                                                                                                                                                                                                                                                                                                                                                                               | N/A              | N/A                                                                                                                                                                                                                                                                                                                                                                                                                                                                                                                                                                                         |
| <b>Direct Selective Culture Method Results:</b>                                                              |                                                                                                                                                                                                                                                                                                     |                                                                                                                                                                                                                                                                                                                                                                                                                                                               |                                                                                                                                                                                                                                                                                                                                                                                                                                                       |                                                                                                                                                                                                                                                                                                                                                                                                   |                  |                                                                                                                                                                                                                                                                                                                                                                                                                                                                                                                                                                                             |
| Any Growth on Plates Following Inoculation with the Specimen:                                                | N/A                                                                                                                                                                                                                                                                                                 | N/A                                                                                                                                                                                                                                                                                                                                                                                                                                                           | 146 (68.5%)                                                                                                                                                                                                                                                                                                                                                                                                                                           | 29 (13.6%)                                                                                                                                                                                                                                                                                                                                                                                        | N/A              | N/A                                                                                                                                                                                                                                                                                                                                                                                                                                                                                                                                                                                         |
| <b>Recovered Organisms by Culture-Based Methods<sup>d</sup>:</b>                                             |                                                                                                                                                                                                                                                                                                     |                                                                                                                                                                                                                                                                                                                                                                                                                                                               |                                                                                                                                                                                                                                                                                                                                                                                                                                                       |                                                                                                                                                                                                                                                                                                                                                                                                   |                  |                                                                                                                                                                                                                                                                                                                                                                                                                                                                                                                                                                                             |
| Number of Cultures Positive with GNB Recovered that Required Further Workup <sup>e</sup>                     | 27 (12.7%)<br><u>Recovered GNB:</u><br>•17 (63.0%) <i>P. aeruginosa</i><br>•4 (14.8%) <i>S. maltophilia</i><br>•3 (11.1%) <i>E. cloacae</i><br>•1 (3.7%) <i>K. pneumoniae</i><br>•1 (3.7%) <i>S. maltophilia</i> and <i>A. baumannii</i><br>•1 (3.7%) <i>P. aeruginosa</i> and <i>K. pneumoniae</i> | 21 (9.9%)<br><u>Recovered GNB:</u><br>•11 (52.4%) <i>P. aeruginosa</i><br>•3 (14.3%) <i>S. maltophilia</i><br>•1 (4.8%) <i>K. pneumoniae</i><br>•1 (4.8%) <i>A. baumannii</i><br>•1 (4.8%) <i>A. radioresistans</i><br>•1 (4.8%) <i>P. pleoglosida</i> and <i>S. maltophilia</i><br>•1 (4.8%) <i>S. maltophilia</i> and <i>A. baumannii</i><br>•1 (4.8%) <i>P. aeruginosa</i> and <i>P. monteilli</i><br>•1 (4.8%) <i>P. aeruginosa</i> and <i>K. oxytoca</i> | 36 (16.9%)<br><u>Recovered GNB:</u><br>•9 (25.0%) <i>P. aeruginosa</i><br>•7 (19.4%) <i>E. cloacae</i><br>•5 (13.9%) <i>S. maltophilia</i><br>•4 (11.1%) <i>E. coli</i><br>•2 (5.6%) <i>K. pneumoniae</i><br>•1 (2.8%) <i>Hafnia alvei</i><br>•1 (2.8%) <i>E. aerogenes</i><br>•1 (2.8%) <i>A. radioresistans</i><br>•1 (2.8%) <i>C. amalonaticus</i> and <i>K. pneumoniae</i><br>•1 (2.8%) <i>C. amalonaticus</i> , <i>P. aeruginosa</i> , <i>K.</i> | 26 (12.2%)<br><u>Recovered GNB:</u><br>•11 (42.3%) <i>P. aeruginosa</i><br>•7 (26.9%) <i>S. maltophilia</i><br>•2 (7.7%) <i>C. amalonaticus</i><br>•1 (3.8%) <i>E. cloacae</i><br>•1 (3.8%) <i>E. coli</i><br>•1 (3.8%) <i>K. pneumoniae</i><br>•1 (3.8%) <i>A. baumannii</i><br>•1 (3.8%) <i>P. aeruginosa</i> and <i>A. baumannii</i><br>•1 (3.8%) <i>E. cloacae</i> and 1 <i>P. aeruginosa</i> | N/A              | 41 (19.2%)<br><u>Recovered GNB:</u><br>•11 (26.2%) <i>P. aeruginosa</i><br>•7 (16.7%) <i>E. cloacae</i><br>•5 (11.9%) <i>S. maltophilia</i><br>•5 (11.9%) <i>E. coli</i><br>•2 (4.8%) <i>K. pneumoniae</i><br>•1 (2.4%) <i>H. alvei</i><br>•1 (2.4%) <i>P. aeruginosa</i> , <i>P. monteilli</i> and <i>A. baumannii</i><br>•1 (2.4%) <i>Serratia marcescens</i> and <i>E. cloacae</i><br>•1 (2.4%) <i>A. baumannii</i> and <i>S. maltophilia</i><br>•1 (2.4%) <i>P. pleoglosida</i> and <i>S. maltophilia</i><br>•1 (2.4%) <i>E. cloacae</i> , <i>P. aeruginosa</i> and <i>A. baumannii</i> |

|                                              |                                                                                                                                                                                                                                                                                                            |                                                                                                                                                                                                                                                  |                                                                                                                                                                                                                                                                                                                                                                                                                                                                                            |                                                                                                                                                                                                                                                                                                                                                                                                                                 |     |                                                                                                                                                                                                                                                                                                                                                                                                                                                                                                        |
|----------------------------------------------|------------------------------------------------------------------------------------------------------------------------------------------------------------------------------------------------------------------------------------------------------------------------------------------------------------|--------------------------------------------------------------------------------------------------------------------------------------------------------------------------------------------------------------------------------------------------|--------------------------------------------------------------------------------------------------------------------------------------------------------------------------------------------------------------------------------------------------------------------------------------------------------------------------------------------------------------------------------------------------------------------------------------------------------------------------------------------|---------------------------------------------------------------------------------------------------------------------------------------------------------------------------------------------------------------------------------------------------------------------------------------------------------------------------------------------------------------------------------------------------------------------------------|-----|--------------------------------------------------------------------------------------------------------------------------------------------------------------------------------------------------------------------------------------------------------------------------------------------------------------------------------------------------------------------------------------------------------------------------------------------------------------------------------------------------------|
|                                              |                                                                                                                                                                                                                                                                                                            |                                                                                                                                                                                                                                                  | <p><i>pneumonia</i> and <i>K. oxytoca</i></p> <ul style="list-style-type: none"> <li>• 1 (2.8%) <i>A. baumannii</i> and <i>S. maltophilia</i></li> <li>• 1 (2.8%) <i>Serratia marcescens</i> and <i>E. cloacae</i></li> <li>• 1 (2.8%) <i>E. cloacae</i> and <i>E. ludwigii</i></li> <li>• 1 (2.8%) <i>K. pneumoniae</i> and <i>E. cloacae</i></li> </ul>                                                                                                                                  |                                                                                                                                                                                                                                                                                                                                                                                                                                 |     | <ul style="list-style-type: none"> <li>• 1 (2.4%) <i>E. cloacae</i> and <i>E. ludwigii</i></li> <li>• 1 (2.4%) <i>C. amalonaticus</i>, <i>K. pneumoniae</i> and <i>P. aeruginosa</i></li> <li>• 1 (2.4%) <i>C. amalonaticus</i>, <i>P. aeruginosa</i>, <i>K. pneumoniae</i> and <i>K. oxytoca</i></li> <li>• 1 (2.4%) <i>E. cloacae</i> and <i>P. aeruginosa</i></li> <li>• 1 (2.4%) <i>K. pneumoniae</i> and <i>E. cloacae</i></li> <li>• 1 (2.4%) <i>P. aeruginosa</i> and <i>E. coli</i></li> </ul> |
| <b>Number of Cultures Positive with CRO:</b> | <p><b>11 (5.2%)</b></p> <p><u>Recovered CRO:</u></p> <ul style="list-style-type: none"> <li>• 5 (45.5%) <i>S. maltophilia</i></li> <li>• 3 (27.3%) <i>E. cloacae</i> (Ert R and Mero S)</li> <li>• 2 (18.2%) <i>P. aeruginosa</i></li> <li>• 1 (9.1%) <i>K. pneumoniae</i> (Ert R &amp; Mero R)</li> </ul> | <p><b>8 (3.8%)</b></p> <p><u>Recovered CRO:</u></p> <ul style="list-style-type: none"> <li>• 5 (62.5%) <i>S. maltophilia</i></li> <li>• 2 (25.0%) <i>P. aeruginosa</i></li> <li>• 1 (12.5%) <i>K. pneumoniae</i> (Ert R &amp; Mero R)</li> </ul> | <p><b>18 (8.5%)</b></p> <p><u>Recovered CRO:</u></p> <ul style="list-style-type: none"> <li>• 7 (38.9%) <i>S. maltophilia</i></li> <li>• 4 (22.2%) <i>E. cloacae</i> (Ert R and Mero S)</li> <li>• 2 (11.1%) <i>P. aeruginosa</i></li> <li>• 2 (11.1%) <i>C. amalonaticus</i> (Ert R and Mero R)</li> <li>• 1 (5.6%) <i>Hafnia alvei</i> (Ert R and Mero S)</li> <li>• 1 (5.6%) <i>K. pneumoniae</i> (Ert R &amp; Mero R)</li> <li>• 1 (5.6%) <i>E. coli</i> (Ert R and Mero S)</li> </ul> | <p><b>15 (7.0%)</b></p> <p><u>Recovered CRO:</u></p> <ul style="list-style-type: none"> <li>• 7 (38.9%) <i>S. maltophilia</i></li> <li>• 2 (22.2%) <i>E. cloacae</i> (Ert R and Mero S)</li> <li>• 2 (11.1%) <i>P. aeruginosa</i></li> <li>• 2 (11.1%) <i>C. amalonaticus</i> (Ert R and Mero R)</li> <li>• 1 (5.6%) <i>K. pneumoniae</i> (Ert R &amp; Mero R)</li> <li>• 1 (5.6%) <i>E. coli</i> (Ert R and Mero S)</li> </ul> | N/A | <p><b>20 (9.4%)</b></p> <p><u>Recovered CRO:</u></p> <ul style="list-style-type: none"> <li>• 7 (38.9%) <i>S. maltophilia</i></li> <li>• 6 (22.2%) <i>E. cloacae</i> (Ert R and Mero S)</li> <li>• 2 (11.1%) <i>P. aeruginosa</i></li> <li>• 2 (11.1%) <i>C. amalonaticus</i> (Ert R &amp; Mero R)</li> <li>• 1 (5.6%) <i>Hafnia alvei</i> (Ert R and Mero S)</li> <li>• 1 (5.6%) <i>K. pneumoniae</i> (Ert R &amp; Mero R)</li> <li>• 1 (5.6%) <i>E. coli</i> (Ert R and Mero S)</li> </ul>           |
| <b>Number of Cultures Positive with CPO:</b> | <p><b>2 (0.9%)</b></p> <p><u>Recovered CPO:</u></p> <ul style="list-style-type: none"> <li>• 1 KPC-producing <i>K. pneumoniae</i> (Ert &amp; Mero R)</li> <li>• 1 KPC-producing <i>E. cloacae</i> (Ert R and Mero S)</li> </ul>                                                                            | <p><b>1 (0.5%)</b></p> <p><u>Recovered CPO:</u></p> <ul style="list-style-type: none"> <li>• 1 KPC-producing <i>K. pneumoniae</i> (Ert R &amp; Mero R)</li> </ul>                                                                                | <p><b>4 (1.9%)</b></p> <p><u>Recovered CPO:</u></p> <ul style="list-style-type: none"> <li>• 2 (50.0%) <i>C. amalonaticus</i> (Ert R &amp; Mero R)</li> <li>• 1 (25.0%) KPC-producing <i>E. cloacae</i> (Ert R and Mero S)</li> <li>• 1 (25.0%) KPC-producing</li> </ul>                                                                                                                                                                                                                   | <p><b>5 (2.3%)</b></p> <p><u>Recovered CPO:</u></p> <ul style="list-style-type: none"> <li>• 2 (40.0%) <i>C. amalonaticus</i> (Ert R &amp; Mero R)</li> <li>• 2 (40.0%) KPC-producing <i>E. cloacae</i> (Ert R and Mero S)</li> <li>• 1 (10.0%) KPC-producing</li> </ul>                                                                                                                                                        | N/A | <p><b>5 (2.3%)</b></p> <p><u>Recovered CPO:</u></p> <ul style="list-style-type: none"> <li>• 2 (40.0%) <i>C. amalonaticus</i> (Ert R &amp; Mero R)</li> <li>• 2 (40.0%) KPC-producing <i>E. cloacae</i> (Ert R and Mero S)</li> <li>• 1 (10.0%) KPC-producing <i>K. pneumoniae</i> (Ert R &amp; Mero R)</li> </ul>                                                                                                                                                                                     |

|                                            |     |     |                                          |                                          |                                                                                                                                                                                        |                                                                                                                                                                                      |
|--------------------------------------------|-----|-----|------------------------------------------|------------------------------------------|----------------------------------------------------------------------------------------------------------------------------------------------------------------------------------------|--------------------------------------------------------------------------------------------------------------------------------------------------------------------------------------|
|                                            |     |     | <i>K. pneumoniae</i><br>(Ert R & Mero R) | <i>K. pneumoniae</i><br>(Ert R & Mero R) |                                                                                                                                                                                        |                                                                                                                                                                                      |
| <b>Check-Direct CPE Molecular Results:</b> |     |     |                                          |                                          |                                                                                                                                                                                        |                                                                                                                                                                                      |
| <b>Carbapenemase<br/>gene positive</b>     | N/A | N/A | N/A                                      | N/A                                      | <b>10 (4.7%)</b><br><ul style="list-style-type: none"> <li>• 7 <i>bla</i><sub>KPC</sub></li> <li>• 2 <i>bla</i><sub>VIM</sub></li> <li>• 1 <i>bla</i><sub>OXA-48-like</sub></li> </ul> | <b>10 (4.7%)</b><br><ul style="list-style-type: none"> <li>• 7 <i>bla</i><sub>KPC</sub></li> <li>• 2 <i>bla</i><sub>VIM</sub></li> <li>1 <i>bla</i><sub>OXA-48-like</sub></li> </ul> |
